# Supplementary material for: Associations of Food Insecurity with Dietary Inflammatory Potential and Risk of Low Muscle Strength
Source: MDPI journal article supplement (doi:10.3390/nu15051120), 2023-02-23
Supplement: s1 [file s1]

**Supplementary Table S1. Median and interquartile range of DII and hand group strength according to food insecurity levels**

| Outcome measures   | All                 | Food insecurity level |                              |                                          |
|--------------------|---------------------|-----------------------|------------------------------|------------------------------------------|
|                    |                     | Food secure (N=7,995) | Mildly food insecure (N=529) | Moderate-to-severe food insecure (N=100) |
| DII                | 1.08 (0.10-2.15)    | 1.05 (0.09-2.11)      | 1.52 (0.41-2.65)             | 2.04 (0.30-3.00)                         |
| Hand Grip Strength | 32.19 (25.51-42.62) | 32.39 (25.65-42.80)   | 30.45 (23.88-40.76)          | 28.82 (22.07-39.78)                      |

Abbreviations: DII, dietary inflammatory index

**Supplementary Table S2. Age- and multivariable<sup>1</sup> adjusted odds ratio (95% confidence intervals) of low muscle strength according to food insecurity levels additionally including protein intakes**

|                          | Food insecurity level |                      |                                  | P-trend <sup>2</sup> |
|--------------------------|-----------------------|----------------------|----------------------------------|----------------------|
|                          | Food secure           | Mildly food insecure | Moderate-to-severe food insecure |                      |
| N. cases/ N. non cases   | 622/7,373             | 67/462               | 19/81                            |                      |
| Age-adjusted OR (95% CI) | 1.00 (ref)            | 1.38 (0.98-1.95)     | 2.76 (1.55-4.92)                 | <.001                |
| MV-adjusted OR (95% CI)  | 1.00 (ref)            | 1.17 (0.82-1.69)     | 2.01 (1.04-3.87)                 | 0.01                 |

<sup>1</sup> Multivariable model adjusted for age (continuous, year), sex (male, female), marital status (married, never married), residence (urban, rural), education level (less than elementary school, middle school graduate, high school graduate, college graduate or higher, missing), income (quartiles, missing), bmi (underweight, normal, overweight, obese, missing), smoking status (never, past, current, missing), alcohol drinking status (never, past, current), physical activity (high, medium, low), number of chronic disease (0, 1,  $\geq 2$ , missing), and protein intakes (continuous, g/d).

<sup>2</sup> P-trend was calculated using the median value of each food insecurity category as a continuous variable

**Supplementary Table S3. Age- and multivariable<sup>1</sup> adjusted odds ratio (95% confidence intervals) of low muscle strength according to food insecurity levels using age-specific cut-off to define low muscle strength<sup>2</sup>**

|                          | Food insecurity level |                      |                                  | P-trend <sup>3</sup> |
|--------------------------|-----------------------|----------------------|----------------------------------|----------------------|
|                          | Food secure           | Mildly food insecure | Moderate-to-severe food insecure |                      |
| N. cases/ N. non cases   | 509/7,486             | 58/471               | 18/82                            |                      |
| Age-adjusted OR (95% CI) | 1.00 (ref)            | 1.34 (0.94-1.93)     | 2.91 (1.59-5.35)                 | <.001                |
| MV-adjusted OR (95% CI)  | 1.00 (ref)            | 1.15 (0.78-1.70)     | 2.41 (1.18-4.90)                 | 0.006                |

<sup>1</sup> Multivariable model adjusted for age (continuous, year), sex (male, female), marital status (married, never married), residence (urban, rural), education level (less than elementary school, middle school graduate, high school graduate, college graduate or higher, missing), income (quartiles, missing), bmi (underweight, normal, overweight, obese, missing), smoking status (never, past, current, missing), alcohol drinking status (never, past, current), physical activity (high, medium, low), and number of chronic disease (0, 1,  $\geq 2$ , missing).

<sup>2</sup> Low muscle strength was defined if participants meet the following age-specific cut-off: <29.6 kg for men and 16.8 kg for women <28 kg if aged 20-39 years and 28.6 kg for men and 16.4 kg for women if aged  $\geq 39$  years [45]

<sup>3</sup> P-trend was calculated using the median value of each food insecurity category as a continuous variable
